# Supplementary material for: Feasibility and acceptability of the smart pillbox and medication label with differentiated care to support person-centered tuberculosis care among ASCENT trial participants – A multicountry study
Source: PubMed Central journal article supplement (PMC10913790; doi:10.3389/fpubh.2024.1327971), 2024-02-20
Supplement: Data_Sheet_1.pdf [file Data_Sheet_1.pdf]

## Supplementary tables

**Table S1: Mean items scores for Capability, Opportunity, and Motivation by country among people with TB using pillbox.**

|                                                                                                                         | Overall (n=210) |              | Ethiopia (n=50) |              | Philippines (n=50) |              | South Africa (n=49) |              | Tanzania (n=61) |              |
|-------------------------------------------------------------------------------------------------------------------------|-----------------|--------------|-----------------|--------------|--------------------|--------------|---------------------|--------------|-----------------|--------------|
|                                                                                                                         | Mean            | (95% CI)     | Mean            | (95% CI)     | Mean               | (95% CI)     | Mean                | (95% CI)     | Mean            | (95% CI)     |
| <b>Capability</b>                                                                                                       |                 |              |                 |              |                    |              |                     |              |                 |              |
| I know how to use the adherence technology                                                                              | 4.46            | (4.29, 4.63) | 4.90            | (4.78, 5.02) | 4.24               | (3.94, 4.54) | 4.37                | (3.79, 4.94) | 4.34            | (4.08, 4.61) |
| The reminders I receive on my phone help me to remember to take my medicine.                                            | 3.97            | (3.78, 4.16) | 4.06            | (3.60, 4.52) | 3.56               | (3.23, 3.89) | 4.33                | (4.11, 4.54) | 3.98            | (3.56, 4.41) |
| The reminders I receive on the medication box help me to remember to take my medicine.                                  | 4.43            | (4.27, 4.58) | 4.62            | (4.15, 5.09) | 4.2                | (3.75, 4.65) | 4.46                | (3.97, 4.94) | 4.42            | (4.20, 4.66) |
| <b>Opportunity</b>                                                                                                      |                 |              |                 |              |                    |              |                     |              |                 |              |
| I am more connected to my healthcare provider while using my adherence technology                                       | 4.38            | (4.18, 4.58) | 4.94            | (4.87, 5.00) | 3.98               | (3.80, 4.16) | 4.20                | (3.72, 4.68) | 4.39            | (4.05, 4.73) |
| I am comfortable using my adherence technology in front of other people.                                                | 3.91            | (3.62, 4.20) | 4.66            | (4.11, 5.21) | 3.44               | (3.18, 3.70) | 4.20                | (3.94, 4.47) | 3.44            | (2.83, 4.05) |
| I am NOT worried that using the adherence technology will make it more likely that others will find out that I have TB. | 3.86            | (3.52, 4.20) | 4.72            | (4.07, 5.37) | 2.96               | (2.44, 3.48) | 3.96                | (3.57, 4.35) | 3.82            | (3.31, 4.33) |
| It DOES NOT take me too much time to take my TB medicine and open the box every day.                                    | 4.35            | (4.18, 4.53) | 4.88            | (4.66, 5.10) | 4.16               | (3.87, 4.45) | 4.06                | (3.89, 4.23) | 4.31            | (3.99, 4.64) |
| I will recommend using adherence technologies to my family or friends if they have TB.                                  | 4.57            | (4.44, 4.71) | 4.88            | (4.68, 5.08) | 4.22               | (3.91, 4.53) | 4.59                | (4.34, 4.84) | 4.59            | (4.41, 4.77) |
| I am comfortable using the adherence technologies outside of my home (for example at work or when I travel).            | 4.02            | (3.71, 4.34) | 4.42            | (4.26, 4.58) | 2.98               | (2.41, 3.55) | 4.29                | (3.98, 4.59) | 4.34            | (3.77, 4.92) |
| I am comfortable taking the medication box to the clinic during my follow-up visit                                      | 4.38            | (4.21, 4.55) | 4.76            | (4.62, 4.90) | 4.00               | (3.76, 4.24) | 4.24                | (3.93, 4.56) | 4.47            | (4.08, 4.87) |
| <b>Motivation</b>                                                                                                       |                 |              |                 |              |                    |              |                     |              |                 |              |
| Using my adherence technology will help me complete my TB treatment.                                                    | 4.55            | (4.44, 4.67) | 4.78            | (4.54, 5.02) | 4.34               | (4.04, 4.64) | 4.55                | (4.26, 4.84) | 4.54            | (4.36, 4.72) |
| Using adherence technologies while taking TB medicines will help me get healthy.                                        | 4.49            | (4.35, 4.63) | 4.84            | (4.65, 5.03) | 4.26               | (3.90, 4.62) | 4.47                | (4.19, 4.75) | 4.41            | (4.19, 4.63) |
| The instructions on the adherence technology makes it easy for me to remember what to do.                               | 4.38            | (4.24, 4.51) | 4.66            | (4.49, 4.83) | 4.10               | (3.91, 4.29) | 4.33                | (3.99, 4.65) | 4.41            | (4.13, 4.69) |
| I am NOT concerned about the privacy of my health information collected by the adherence technology                     | 4.18            | (3.90, 4.46) | 4.92            | (4.76, 5.08) | 3.34               | (3.02, 3.66) | 3.96                | (3.66, 4.26) | 4.44            | (4.11, 4.77) |

**Table S2: Capability, Opportunity, and Motivation scores by country among people with TB using medication labels**

|                                                                                                                         | Overall (n=169) |              | Ethiopia (n=50) |              | Philippines (n=52) |              | South Africa (n=29) |              | Tanzania (n=38) |              |
|-------------------------------------------------------------------------------------------------------------------------|-----------------|--------------|-----------------|--------------|--------------------|--------------|---------------------|--------------|-----------------|--------------|
|                                                                                                                         | Mean            | (95% CI)     | Mean            | (95% CI)     | Mean               | (95% CI)     | Mean                | (95% CI)     | Mean            | (95% CI)     |
| <b>Capability</b>                                                                                                       |                 |              |                 |              |                    |              |                     |              |                 |              |
| I know how to use the adherence technology                                                                              | 4.41            | (4.21, 4.62) | 4.70            | (4.07, 5.33) | 4.19               | (3.97, 4.42) | 4.46                | (4.22, 4.71) | 4.29            | (3.68, 4.90) |
| The reminders I receive on my phone help me to remember to take my medicine.                                            | 4.43            | (4.27, 4.58) | 4.48            | (3.89, 5.07) | 4.28               | (3.99, 4.59) | 4.48                | (4.20, 4.77) | 4.50            | (4.18, 4.82) |
| <b>Opportunity</b>                                                                                                      |                 |              |                 |              |                    |              |                     |              |                 |              |
| I am more connected to my healthcare provider while using my adherence technology                                       | 4.34            | (4.11, 4.57) | 4.82            | (4.57, 5.07) | 3.90               | (3.47, 4.33) | 4.27                | (3.74, 4.81) | 4.34            | (3.91, 4.77) |
| I am comfortable using my adherence technology in front of other people.                                                | 4.16            | (3.86, 4.45) | 4.72            | (4.40, 5.04) | 3.79               | (3.08, 4.50) | 4.24                | (3.86, 4.62) | 3.87            | (3.19, 4.54) |
| I am NOT worried that using the adherence technology will make it more likely that others will find out that I have TB. | 3.97            | (3.57, 4.37) | 4.70            | (4.38, 5.02) | 3.25               | (2.19, 4.31) | 4.04                | (3.51, 4.56) | 3.95            | (3.09, 4.81) |
| It DOES NOT take me too much time to take my TB medicine and text for the labels every day.                             | 4.18            | (3.92, 4.45) | 4.80            | (4.54, 5.06) | 3.94               | (3.54, 4.34) | 3.83                | (3.38, 4.28) | 3.97            | (3.29, 4.65) |
| I will recommend using adherence technologies to my family or friends if they have TB.                                  | 4.59            | (4.38, 4.80) | 4.96            | (4.89, 5.03) | 4.23               | (3.66, 4.81) | 4.55                | (4.25, 4.86) | 4.63            | (4.38, 4.88) |
| I am comfortable using the adherence technologies outside of my home (for example at work or when I travel).            | 4.08            | (3.73, 4.43) | 4.52            | (4.04, 4.99) | 3.50               | (2.33, 4.67) | 4.31                | (4.18, 4.44) | 4.13            | (3.63, 4.64) |
| <b>Motivation</b>                                                                                                       |                 |              |                 |              |                    |              |                     |              |                 |              |
| Using my adherence technology will help me complete my TB treatment.                                                    | 4.48            | (4.31, 4.64) | 4.68            | (4.48, 4.88) | 4.27               | (3.73, 4.81) | 4.50                | (4.32, 4.68) | 4.47            | (4.15, 4.80) |
| Using adherence technologies while taking TB medicines will help me get healthy.                                        | 4.47            | (4.29, 4.65) | 4.74            | (4.44, 5.04) | 4.23               | (3.73, 4.73) | 4.34                | (4.22, 4.47) | 4.53            | (4.25, 4.81) |
| The instructions on the adherence technology makes it easy for me to remember what to do.                               | 4.37            | (4.22, 4.51) | 4.68            | (4.37, 4.99) | 4.12               | (4.01, 4.22) | 4.28                | (4.01, 4.55) | 4.37            | (4.13, 4.61) |
| I am NOT concerned about the privacy of my health information collected by the adherence technology                     | 4.05            | (3.69, 4.40) | 4.76            | (4.35, 5.17) | 3.31               | (2.82, 3.79) | 4.00                | (3.60, 4.40) | 4.16            | (3.71, 4.61) |

**Table S3a: Mean Capability, Opportunity, and Motivation scores by sex, age and treatment phase among participants using the pillbox**

|                                                                                                                         | Sex           |                     |              |                     | Age, grouped     |                     |                   |                     |
|-------------------------------------------------------------------------------------------------------------------------|---------------|---------------------|--------------|---------------------|------------------|---------------------|-------------------|---------------------|
|                                                                                                                         | Female (n=95) |                     | Male (n=115) |                     | <40 years (n=97) |                     | ≥40 years (n=113) |                     |
|                                                                                                                         | Mean          | 95% CI              | Mean         | 95% CI              | Mean             | 95% CI              | Mean              | 95% CI              |
| <b>Capability</b>                                                                                                       | <b>4.23</b>   | <b>(4.08, 4.39)</b> | <b>4.33</b>  | <b>(4.18, 4.49)</b> | <b>4.31</b>      | <b>(4.12, 4.50)</b> | <b>4.27</b>       | <b>(4.14, 4.39)</b> |
| I know how to use the adherence technology                                                                              | 4.39          | (4.21, 4.57)        | 4.51         | (4.32, 4.71)        | 4.45             | (4.20, 4.71)        | 4.46              | (4.31, 4.60)        |
| The reminders I receive on my phone help me to remember to take my medicine.                                            | 3.93          | (3.69, 4.18)        | 4.00         | (3.78, 4.22)        | 4.04             | (3.78, 4.30)        | 3.91              | (3.68, 4.13)        |
| The reminders I receive on the medication box help me to remember to take my medicine.                                  | 4.36          | (4.15, 4.57)        | 4.48         | (4.30, 4.65)        | 4.44             | (4.20, 4.68)        | 4.42              | (4.25, 4.58)        |
| <b>Opportunity</b>                                                                                                      | <b>4.14</b>   | <b>(3.93, 4.36)</b> | <b>4.27</b>  | <b>(4.09, 4.45)</b> | <b>4.30</b>      | <b>(4.08, 4.52)</b> | <b>4.13</b>       | <b>(3.94, 4.32)</b> |
| I am more connected to my healthcare provider while using my adherence technology                                       | 4.32          | (4.08, 4.55)        | 4.43         | (4.24, 4.63)        | 4.52             | (4.25, 4.78)        | 4.27              | (4.08, 4.45)        |
| I am comfortable using my adherence technology in front of other people.                                                | 3.83          | (3.52, 4.14)        | 3.97         | (3.63, 4.32)        | 4.05             | (3.70, 4.40)        | 3.79              | (3.46, 4.11)        |
| I am NOT worried that using the adherence technology will make it more likely that others will find out that I have TB. | 3.74          | (3.31, 4.17)        | 3.97         | (3.66, 4.27)        | 3.94             | (3.50, 4.38)        | 3.80              | (3.44, 4.16)        |
| It DOES NOT take me too much time to take my TB medicine and open the box every day.                                    | 4.37          | (4.19, 4.44)        | 4.34         | (4.13, 4.55)        | 4.44             | (4.20, 4.68)        | 4.28              | (4.10, 4.46)        |
| I will recommend using adherence technologies to my family or friends if they have TB.                                  | 4.53          | (4.36, 4.70)        | 4.61         | (4.47, 4.75)        | 4.64             | (4.46, 4.81)        | 4.51              | (4.37, 4.65)        |
| I am comfortable using the adherence technologies outside of my home (for example at work or when I travel).            | 3.92          | (3.53, 4.29)        | 4.11         | (3.79, 4.43)        | 4.11             | (3.79, 4.44)        | 3.95              | (3.58, 4.31)        |
| I am comfortable taking the medication box to the clinic during my follow-up visit                                      | 4.32          | (4.15, 4.48)        | 4.43         | (4.22, 4.63)        | 4.41             | (4.21, 4.62)        | 4.35              | (4.16, 4.53)        |
| <b>Motivation</b>                                                                                                       | <b>4.40</b>   | <b>(4.26, 4.54)</b> | <b>4.40</b>  | <b>(4.24, 4.56)</b> | <b>4.46</b>      | <b>(4.29, 4.63)</b> | <b>4.35</b>       | <b>(4.20, 4.50)</b> |
| Using my adherence technology will help me complete my TB treatment.                                                    | 4.53          | (4.39, 4.66)        | 4.57         | (4.44, 4.71)        | 4.65             | (4.53, 4.77)        | 4.47              | (4.32, 4.62)        |
| Using adherence technologies while taking TB medicines will help me get healthy.                                        | 4.52          | (4.36, 4.67)        | 4.47         | (4.33, 4.61)        | 4.58             | (4.43, 4.73)        | 4.42              | (4.27, 4.56)        |
| The instructions on the adherence technology makes it easy for me to remember what to do.                               | 4.32          | (4.19, 4.44)        | 4.43         | (4.25, 4.60)        | 4.41             | (4.21, 4.61)        | 4.35              | (4.21, 4.48)        |
| I am NOT concerned about the privacy of my health information collected by the adherence technology                     | 4.24          | (3.96, 4.53)        | 4.13         | (3.81, 4.44)        | 4.21             | (3.86, 4.55)        | 4.16              | (3.84, 4.48)        |

**Table S3b: Mean Capability, Opportunity, and Motivation scores by sex, age and treatment phase among participants using the pillbox**

|                                                                                                                         | Treatment phase        |                     |                            |                     | Area of residence |                     |              |                     |
|-------------------------------------------------------------------------------------------------------------------------|------------------------|---------------------|----------------------------|---------------------|-------------------|---------------------|--------------|---------------------|
|                                                                                                                         | Intensive phase (n=79) |                     | Continuation phase (n=131) |                     | Urban (n=151)     |                     | Rural (n=59) |                     |
|                                                                                                                         | Mean                   | 95% CI              | Mean                       | 95% CI              | Mean              | 95% CI              | Mean         | 95% CI              |
| <b>Capability</b>                                                                                                       | <b>4.20</b>            | <b>(4.03, 4.37)</b> | <b>4.34</b>                | <b>(4.20, 4.48)</b> | <b>4.25</b>       | <b>(4.07, 4.43)</b> | <b>4.37</b>  | <b>(4.16, 4.58)</b> |
| I know how to use the adherence technology                                                                              | 4.42                   | (4.16, 4.68)        | 4.48                       | (4.32, 4.64)        | 4.40              | (4.18, 4.63)        | 4.59         | (4.34, 4.84)        |
| The reminders I receive on my phone help me to remember to take my medicine.                                            | 3.91                   | (3.65, 4.17)        | 4.01                       | (3.78, 4.23)        | 3.97              | (3.73, 4.21)        | 3.98         | (3.57, 4.40)        |
| The reminders I receive on the medication box help me to remember to take my medicine.                                  | 4.26                   | (4.03, 4.50)        | 4.52                       | (4.37, 4.68)        | 4.39              | (4.18, 4.59)        | 4.53         | (4.23, 4.82)        |
| <b>Opportunity</b>                                                                                                      | <b>4.15</b>            | <b>(3.97, 4.34)</b> | <b>4.25</b>                | <b>(4.04, 4.46)</b> | <b>4.21</b>       | <b>(3.97, 4.45)</b> | <b>4.21</b>  | <b>(3.84, 4.57)</b> |
| I am more connected to my healthcare provider while using my adherence technology                                       | 4.38                   | (4.14, 4.61)        | 4.38                       | (4.18, 4.58)        | 4.37              | (4.12, 4.62)        | 4.41         | (4.03, 4.78)        |
| I am comfortable using my adherence technology in front of other people.                                                | 3.75                   | (3.38, 4.11)        | 4.01                       | (3.67, 4.35)        | 4.01              | (3.69, 4.34)        | 3.64         | (2.90, 4.39)        |
| I am NOT worried that using the adherence technology will make it more likely that others will find out that I have TB. | 3.78                   | (3.45, 4.12)        | 3.91                       | (3.50, 4.32)        | 3.89              | (3.46, 4.28)        | 3.84         | (3.03, 4.67)        |
| It DOES NOT take me too much time to take my TB medicine and open the box every day.                                    | 4.35                   | (4.12, 4.57)        | 4.36                       | (4.19, 4.53)        | 4.32              | (4.10, 4.54)        | 4.44         | (4.09, 4.80)        |
| I will recommend using adherence technologies to my family or friends if they have TB.                                  | 4.52                   | (4.33, 4.70)        | 4.60                       | (4.46, 4.75)        | 4.56              | (4.37, 4.75)        | 4.59         | (4.44, 4.75)        |
| I am comfortable using the adherence technologies outside of my home (for example at work or when I travel).            | 3.95                   | (3.62, 4.27)        | 4.07                       | (3.72, 4.42)        | 4.02              | (3.63, 4.41)        | 4.03         | (3.39, 4.67)        |
| I am comfortable taking the medication box to the clinic during my follow-up visit                                      | 4.34                   | (4.12, 4.56)        | 4.40                       | (4.23, 4.57)        | 4.34              | (4.12, 4.55)        | 4.47         | (4.17, 4.78)        |
| <b>Motivation</b>                                                                                                       | <b>4.37</b>            | <b>(4.21, 4.53)</b> | <b>4.42</b>                | <b>(4.27, 4.57)</b> | <b>4.39</b>       | <b>(4.20, 4.58)</b> | <b>4.43</b>  | <b>(4.18, 4.69)</b> |
| Using my adherence technology will help me complete my TB treatment.                                                    | 4.51                   | (4.38, 4.64)        | 4.58                       | (4.45, 4.71)        | 4.54              | (4.39, 4.69)        | 4.58         | (4.39, 4.76)        |
| Using adherence technologies while taking TB medicines will help me get healthy.                                        | 4.41                   | (4.22, 4.59)        | 4.54                       | (4.40, 4.68)        | 4.52              | (4.35, 4.68)        | 4.42         | (4.12, 4.72)        |
| The instructions on the adherence technology makes it easy for me to remember what to do.                               | 4.37                   | (4.17, 4.56)        | 4.38                       | (4.25, 4.51)        | 4.33              | (4.16, 4.50)        | 4.49         | (4.27, 4.71)        |
| I am NOT concerned about the privacy of my health information collected by the adherence technology                     | 4.20                   | (3.92, 4.48)        | 4.17                       | (3.86, 4.47)        | 4.16              | (3.83, 4.49)        | 4.24         | (3.60, 4.88)        |

**Table S4a: Mean Capability, Opportunity, and Motivation scores by sex, age and treatment phase among participants using labels**

|                                                                                                                         | Female (n=73) |                     | Sex<br>Male (n=96) |                     | Age, grouped     |                     |                  |                     |
|-------------------------------------------------------------------------------------------------------------------------|---------------|---------------------|--------------------|---------------------|------------------|---------------------|------------------|---------------------|
|                                                                                                                         |               |                     |                    |                     | <40 years (n=96) |                     | ≥40 years (n=73) |                     |
|                                                                                                                         | Mean          | 95% CI              | Mean               | 95% CI              | Mean             | 95% CI              | Mean             | 95% CI              |
| <b>Capability</b>                                                                                                       | <b>4.32</b>   | <b>(4.10, 4.54)</b> | <b>4.49</b>        | <b>(4.37, 4.62)</b> | <b>4.48</b>      | <b>(4.30, 4.65)</b> | <b>4.34</b>      | <b>(4.19, 4.50)</b> |
| I know how to use the adherence technology                                                                              | 4.30          | (3.97, 4.63)        | 4.49               | (4.32, 4.67)        | 4.52             | (4.26, 4.77)        | 4.27             | (4.05, 4.49)        |
| The reminders I receive on my phone help me to remember to take my medicine.                                            | 4.34          | (4.08, 4.61)        | 4.49               | (4.37, 4.61)        | 4.44             | (4.24, 4.64)        | 4.41             | (4.26, 4.56)        |
| <b>Opportunity</b>                                                                                                      | <b>4.19</b>   | <b>(3.90, 4.49)</b> | <b>4.24</b>        | <b>(4.02, 4.45)</b> | <b>4.32</b>      | <b>(4.07, 4.58)</b> | <b>4.09</b>      | <b>(3.84, 4.33)</b> |
| I am more connected to my healthcare provider while using my adherence technology                                       | 4.30          | (4.04, 4.56)        | 4.36               | (4.10, 4.63)        | 4.51             | (4.27, 4.75)        | 4.11             | (3.84, 4.37)        |
| I am comfortable using my adherence technology in front of other people.                                                | 4.07          | (3.65, 4.49)        | 4.23               | (3.98, 4.48)        | 4.27             | (3.94, 4.60)        | 4.01             | (3.71, 4.31)        |
| I am NOT worried that using the adherence technology will make it more likely that others will find out that I have TB. | 4.07          | (3.64, 4.50)        | 3.89               | (3.41, 4.38)        | 4.08             | (3.63, 4.54)        | 3.82             | (3.41, 4.24)        |
| It DOES NOT take me too much time to take my TB medicine and text for the labels every day.                             | 4.07          | (3.77, 4.37)        | 4.27               | (3.95, 4.59)        | 4.27             | (3.98, 4.56)        | 4.07             | (3.77, 4.37)        |
| I will recommend using adherence technologies to my family or friends if they have TB.                                  | 4.58          | (4.30, 4.85)        | 4.60               | (4.43, 4.78)        | 4.66             | (4.45, 4.87)        | 4.51             | (4.26, 4.75)        |
| I am comfortable using the adherence technologies outside of my home (for example at work or when I travel).            | 4.08          | (3.64, 4.52)        | 4.08               | (3.75, 4.41)        | 4.15             | (3.78, 4.51)        | 4.00             | (3.59, 4.41)        |
| <b>Motivation</b>                                                                                                       | <b>4.34</b>   | <b>(4.08, 4.60)</b> | <b>4.34</b>        | <b>(4.20, 4.48)</b> | <b>4.39</b>      | <b>(4.21, 4.58)</b> | <b>4.27</b>      | <b>(4.04, 4.49)</b> |
| Using my adherence technology will help me complete my TB treatment.                                                    | 4.44          | (4.21, 4.68)        | 4.50               | (4.33, 4.67)        | 4.52             | (4.33, 4.70)        | 4.42             | (4.19, 4.66)        |
| Using adherence technologies while taking TB medicines will help me get healthy.                                        | 4.45          | (4.22, 4.68)        | 4.48               | (4.31, 4.65)        | 4.52             | (4.33, 4.71)        | 4.40             | (4.19, 4.61)        |
| The instructions on the adherence technology makes it easy for me to remember what to do.                               | 4.34          | (4.14, 4.54)        | 4.39               | (4.26, 4.51)        | 4.42             | (4.27, 4.56)        | 4.30             | (4.08, 4.52)        |
| I am NOT concerned about the privacy of my health information collected by the adherence technology                     | 4.11          | (3.60, 4.62)        | 4.00               | (3.67, 4.33)        | 4.13             | (3.74, 4.51)        | 3.95             | (3.54, 4.35)        |

**Table S4b: Mean Capability, Opportunity, and Motivation scores by sex, age and treatment phase among participants using labels**

|                                                                                                                         | Treatment phase        |                     |                            |                     | Area of residence |                     |              |                     |
|-------------------------------------------------------------------------------------------------------------------------|------------------------|---------------------|----------------------------|---------------------|-------------------|---------------------|--------------|---------------------|
|                                                                                                                         | Intensive phase (n=50) |                     | Continuation phase (n=119) |                     | Urban (n=115)     |                     | Rural (n=54) |                     |
|                                                                                                                         | Mean                   | 95% CI              | Mean                       | 95% CI              | Mean              | 95% CI              | Mean         | 95% CI              |
| <b>Capability</b>                                                                                                       | <b>4.39</b>            | <b>(4.18, 4.60)</b> | <b>4.43</b>                | <b>(4.28, 4.58)</b> | <b>4.45</b>       | <b>(4.24, 4.66)</b> | <b>4.35</b>  | <b>(4.21, 4.49)</b> |
| I know how to use the adherence technology                                                                              | 4.42                   | (4.11, 4.73)        | 4.41                       | (4.18, 4.63)        | 4.39              | (4.10, 4.69)        | 4.44         | (4.13, 4.76)        |
| The reminders I receive on my phone help me to remember to take my medicine.                                            | 4.36                   | (4.10, 4.62)        | 4.45                       | (4.31, 4.60)        | 4.50              | (4.35, 4.66)        | 4.26         | (3.88, 4.64)        |
| <b>Opportunity</b>                                                                                                      | <b>4.22</b>            | <b>(3.92, 4.52)</b> | <b>4.22</b>                | <b>(3.98, 4.46)</b> | <b>4.25</b>       | <b>(3.98, 4.52)</b> | <b>4.16</b>  | <b>(3.56, 4.77)</b> |
| I am more connected to my healthcare provider while using my adherence technology                                       | 4.22                   | (3.92, 4.52)        | 4.39                       | (4.13, 4.64)        | 4.41              | (4.15, 4.67)        | 4.19         | (3.63, 4.74)        |
| I am comfortable using my adherence technology in front of other people.                                                | 3.94                   | (3.48, 4.40)        | 4.25                       | (3.98, 4.53)        | 4.23              | (3.90, 4.55)        | 4.02         | (3.30, 4.74)        |
| I am NOT worried that using the adherence technology will make it more likely that others will find out that I have TB. | 4.20                   | (3.77, 4.63)        | 3.87                       | (3.44, 4.31)        | 3.97              | (3.51, 4.44)        | 3.96         | (3.00, 4.93)        |
| It DOES NOT take me too much time to take my TB medicine and text for the labels every day.                             | 4.20                   | (3.78, 4.62)        | 4.18                       | (3.92, 4.43)        | 4.17              | (3.79, 4.54)        | 4.22         | (3.84, 4.61)        |
| I will recommend using adherence technologies to my family or friends if they have TB.                                  | 4.64                   | (4.39, 4.89)        | 4.57                       | (4.37, 4.78)        | 4.57              | (4.28, 4.87)        | 4.63         | (4.28, 4.98)        |
| I am comfortable using the adherence technologies outside of my home (for example at work or when I travel).            | 4.12                   | (3.78, 4.46)        | 4.07                       | (3.67, 4.47)        | 4.14              | (3.93, 4.35)        | 3.96         | (2.79, 5.13)        |
| <b>Motivation</b>                                                                                                       | <b>4.28</b>            | <b>(4.05, 4.52)</b> | <b>4.36</b>                | <b>(4.18, 4.54)</b> | <b>4.32</b>       | <b>(4.07, 4.56)</b> | <b>4.39</b>  | <b>(4.06, 4.71)</b> |
| Using my adherence technology will help me complete my TB treatment.                                                    | 4.33                   | (4.05, 4.60)        | 4.54                       | (4.35, 4.73)        | 4.48              | (4.23, 4.73)        | 4.47         | (4.33, 4.62)        |
| Using adherence technologies while taking TB medicines will help me get healthy.                                        | 4.36                   | (4.08, 4.64)        | 4.51                       | (4.34, 4.69)        | 4.45              | (4.22, 4.68)        | 4.50         | (4.15, 4.85)        |
| The instructions on the adherence technology makes it easy for me to remember what to do.                               | 4.26                   | (4.02, 4.49)        | 4.41                       | (4.25, 4.57)        | 4.34              | (4.14, 4.54)        | 4.43         | (4.19, 4.66)        |
| I am NOT concerned about the privacy of my health information collected by the adherence technology                     | 4.18                   | (3.77, 4.59)        | 3.99                       | (3.63, 4.35)        | 4.00              | (3.53, 4.47)        | 4.15         | (3.60, 4.88)        |

**Table S5: Mean Capability, Opportunity, and Motivation scores by facility type among participants in Tanzania and Philippines**

|             | Participants in Tanzania using the pillbox |              |                   |              | Participants in Philippines using the label |              |                   |              |
|-------------|--------------------------------------------|--------------|-------------------|--------------|---------------------------------------------|--------------|-------------------|--------------|
|             | Private (n=20)                             |              | Public (n=41)     |              | Private (n=10)                              |              | Public (n=42)     |              |
|             | Mean <sup>†</sup>                          | 95% CI       | Mean <sup>†</sup> | 95% CI       | Mean <sup>‡</sup>                           | 95% CI       | Mean <sup>†</sup> | 95% CI       |
| Capability  | 4.20                                       | (0.81, 7.59) | 4.28              | (3.94, 4.62) | 4.45                                        | (3.99, 4.91) | 4.19              | (4.08, 4.30) |
| Opportunity | 4.44                                       | (2.35, 6.52) | 4.08              | (3.74, 4.42) | 3.78                                        | (3.41, 4.15) | 3.77              | (3.14, 4.40) |
| Motivation  | 4.49                                       | (3.06, 5.92) | 4.33              | (4.13, 4.74) | 4.20                                        | (4.02, 4.38) | 3.93              | (3.58, 4.28) |

<sup>†</sup>Mean scores are adjusted for clustering <sup>‡</sup> Mean scores are calculated from one cluster
